# Supplementary material for: Tobacco Hornworm (Manduca sexta) Oral Secretion Elicits Reactive Oxygen Species in Isolated Tomato Protoplasts
Source: MDPI journal article supplement (doi:10.3390/ijms21218297), 2020-11-05
Supplement: s1 [file s1]

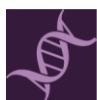

## Supplementary Figure

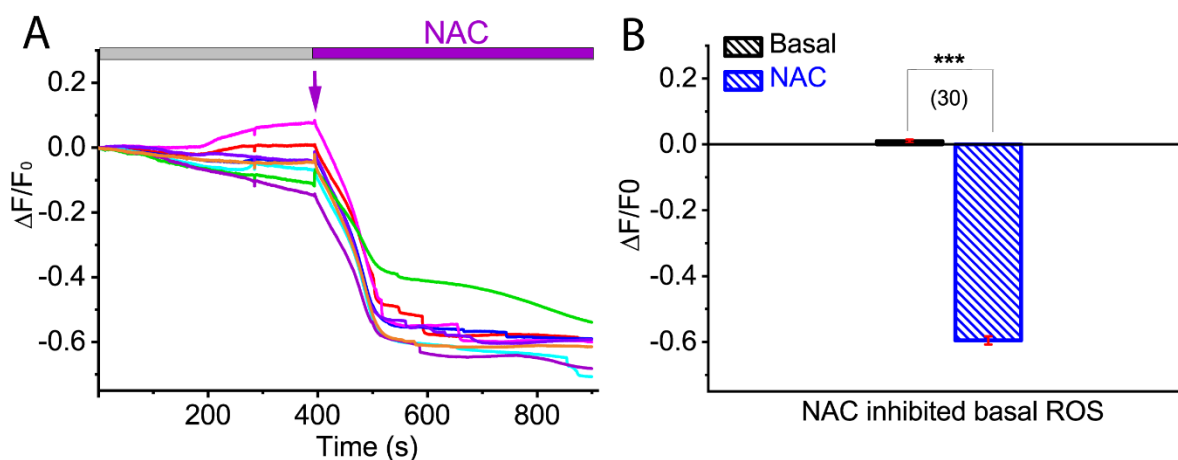

**Supplementary Figure S1:** Effect of NAC on basal ROS level in tomato protoplasts. **(A)** Representative ROS imaging of isolated tomato protoplast with the application of the antioxidant “NAC” **(B)** Bar graph analysis of data shown in **(A)** illustrating the minimum ROS level after NAC application. Statistical indicators reflect the non-parametric Mann-Whitney test, measuring for an effect of NAC on ROS level: \*\*\* $p < 0.0001$ .
